# Supplementary material for: Serum Uric Acid Is Associated with Erectile Dysfunction: A Population-Based Cross-Sectional Study in Chinese Men
Source: PubMed Central journal article supplement (PMC5437090; doi:10.1038/s41598-017-02392-x), 2017-05-18
Supplement: 41598_2017_2392_MOESM1_ESM.pdf [file 41598_2017_2392_MOESM1_ESM.pdf]

# Serum Uric Acid Is Associated with Erectile Dysfunction: A Population-Based Cross-Sectional Study in Chinese Men

Fengbin Gao<sup>1,+</sup>, Boren Jiang<sup>2,+</sup>, Zhen Cang<sup>2</sup>, Ningjian Wang<sup>2</sup>, Bing Han<sup>2</sup>, Qin Li<sup>2</sup>, Yi Chen<sup>2</sup>, Yingchao Chen<sup>2</sup>, Fangzhen Xia<sup>2</sup>, Hualing Zhai<sup>2</sup>, Chi Chen<sup>2</sup>, Meng Lu<sup>2</sup>, Ying Meng<sup>2</sup>, Yingli Lu<sup>2\*</sup>, and Zhoujun Shen<sup>1\*</sup>.

|                         | Men without diabetes | Men with diabetes |                                |                               |
|-------------------------|----------------------|-------------------|--------------------------------|-------------------------------|
|                         |                      | Low UA            | High UA                        | Total                         |
| N                       | 1101                 | 132               | 132                            | 264                           |
| UA( $\mu\text{mol/L}$ ) | 346.7 $\pm$ 75.8     | 264.4 $\pm$ 37.8  | 396.2 $\pm$ 54.9 <sup>##</sup> | 330.3 $\pm$ 81.0 <sup>*</sup> |
| Age(year)               | 54.9 $\pm$ 11.2      | 58.8 $\pm$ 8.4    | 57.6 $\pm$ 9.5                 | 58.2 $\pm$ 8.9 <sup>**</sup>  |
| HbA1c(%)                | 5.6 $\pm$ 0.5        | 7.8 $\pm$ 1.7     | 7.1 $\pm$ 1.0 <sup>#</sup>     | 7.5 $\pm$ 1.4 <sup>**</sup>   |
| FPG(mmol/L)             | 5.2 $\pm$ 0.5        | 8.4 $\pm$ 2.7     | 7.4 $\pm$ 1.9 <sup>#</sup>     | 7.9 $\pm$ 2.4 <sup>**</sup>   |
| BMI(kg/m <sup>2</sup> ) | 25.3 $\pm$ 3.1       | 25.6 $\pm$ 2.9    | 26.6 $\pm$ 3.1 <sup>##</sup>   | 26.1 $\pm$ 3.0 <sup>**</sup>  |
| ED(%)                   | 60.1                 | 74.2              | 70.4                           | 72.3 <sup>**</sup>            |

### Supplementary Table S1. Correlation between UA and ED prevalence in patients with diabetes

The data are summarized as the mean  $\pm$  standard deviation for continuous variables, or as number with proportion for categorical variables. The Mann–Whitney U test was used for non-normally distributed continuous variables, and the Pearson  $\chi^2$  test was used for dichotomous variables

\*P < 0.05, significantly lower than men without diabetes.

\*\*P < 0.05, significantly higher than men without diabetes.

#P < 0.05, significantly lower than low UA group.

##P < 0.05, significantly higher than low UA group.

Abbreviations: UA, uric acid; ED, erectile dysfunction; HbA1c, glycated hemoglobin; FPG, fasting plasma glucose; BMI, body mass index.
